# Supplementary material for: Spatial Variability of Aroma Profiles of Cocoa Trees Obtained through Computer Vision and Machine Learning Modelling: A Cover Photography and High Spatial Remote Sensing Application
Source: Sensors (Basel). 2019 Jul 11;19(14):3054. doi: 10.3390/s19143054 (PMC6678375; doi:10.3390/s19143054)
Supplement: Supplementary file 1 [file sensors-19-03054-s001.pdf]

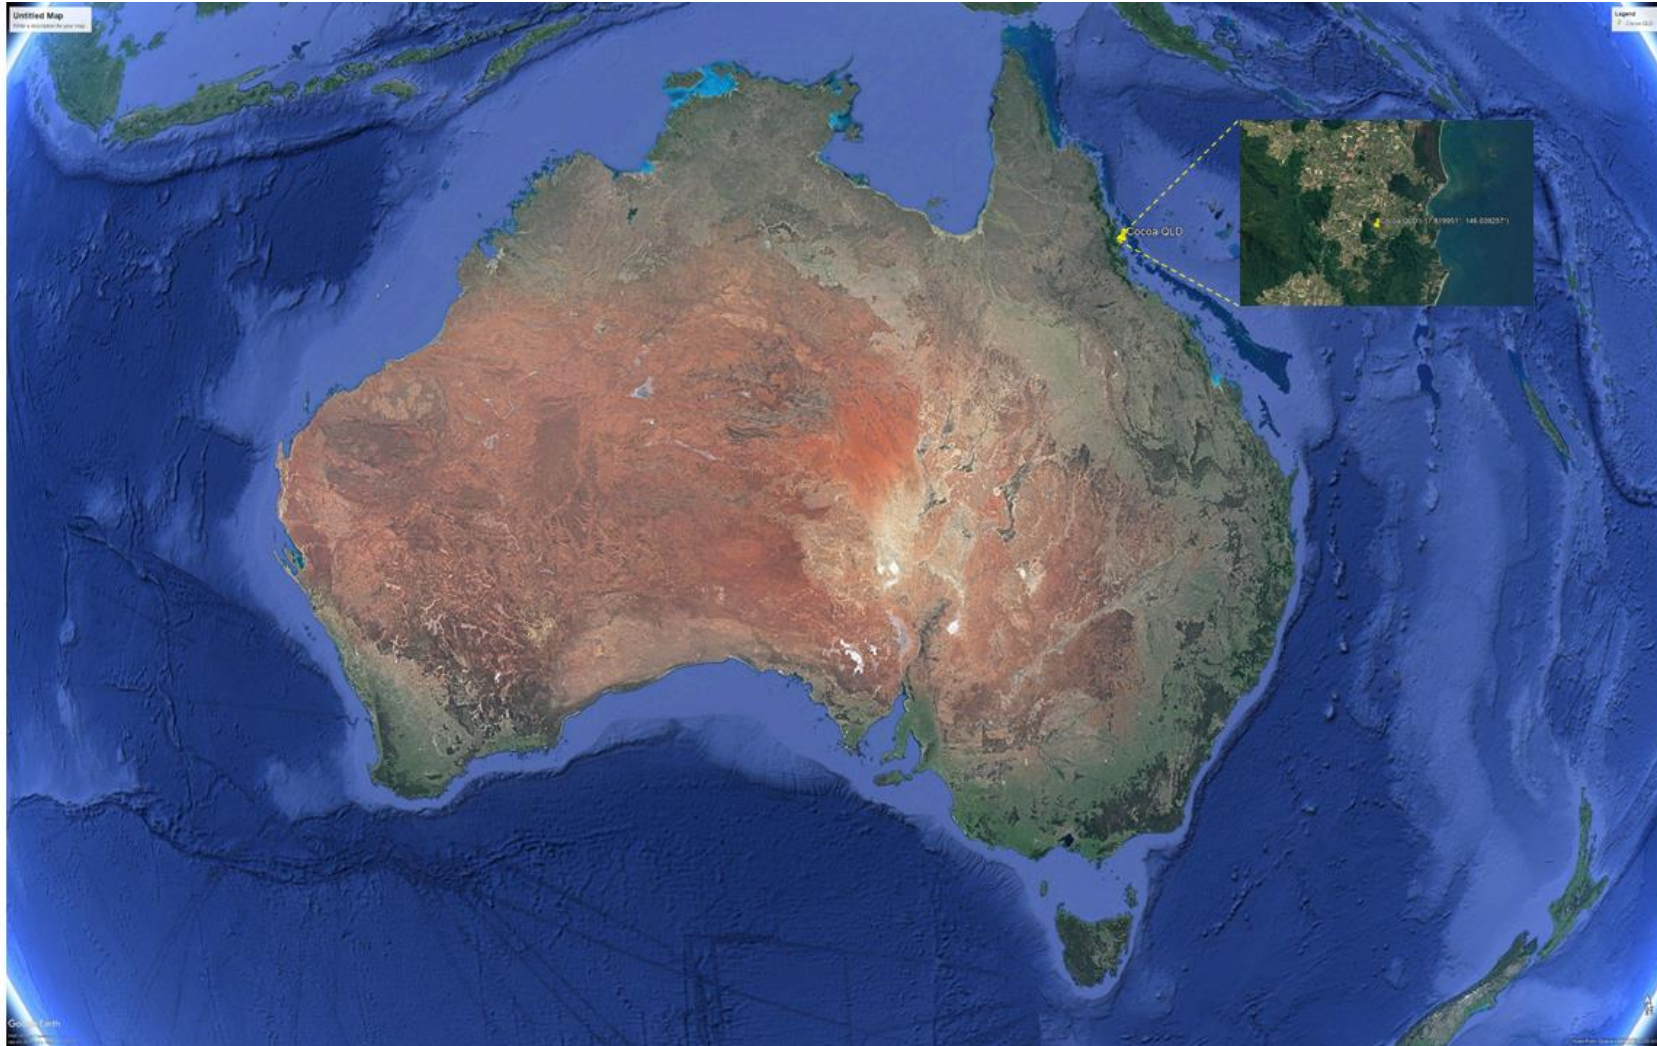

**Figure S1.** Map showing the site location where the study was conducted. Image was obtained from Google Earth (Google Technology Company, Menlo Park, CA, USA)

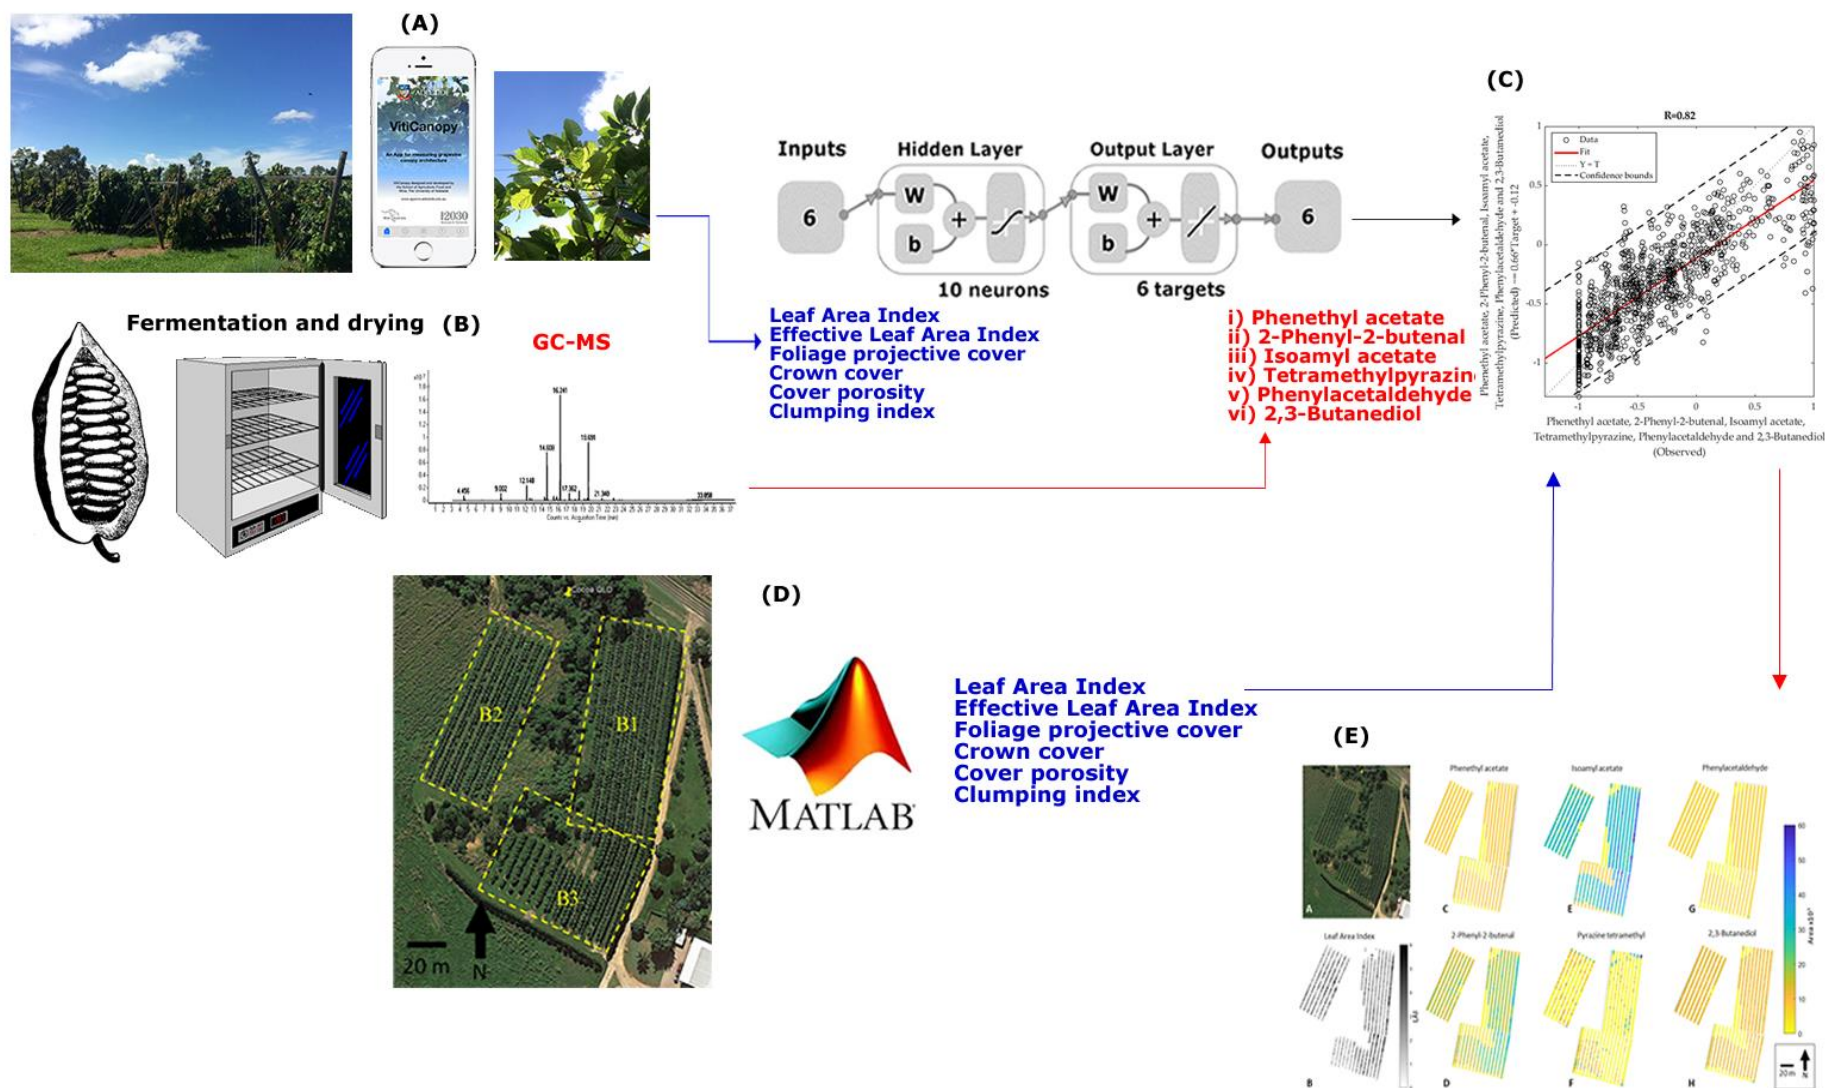

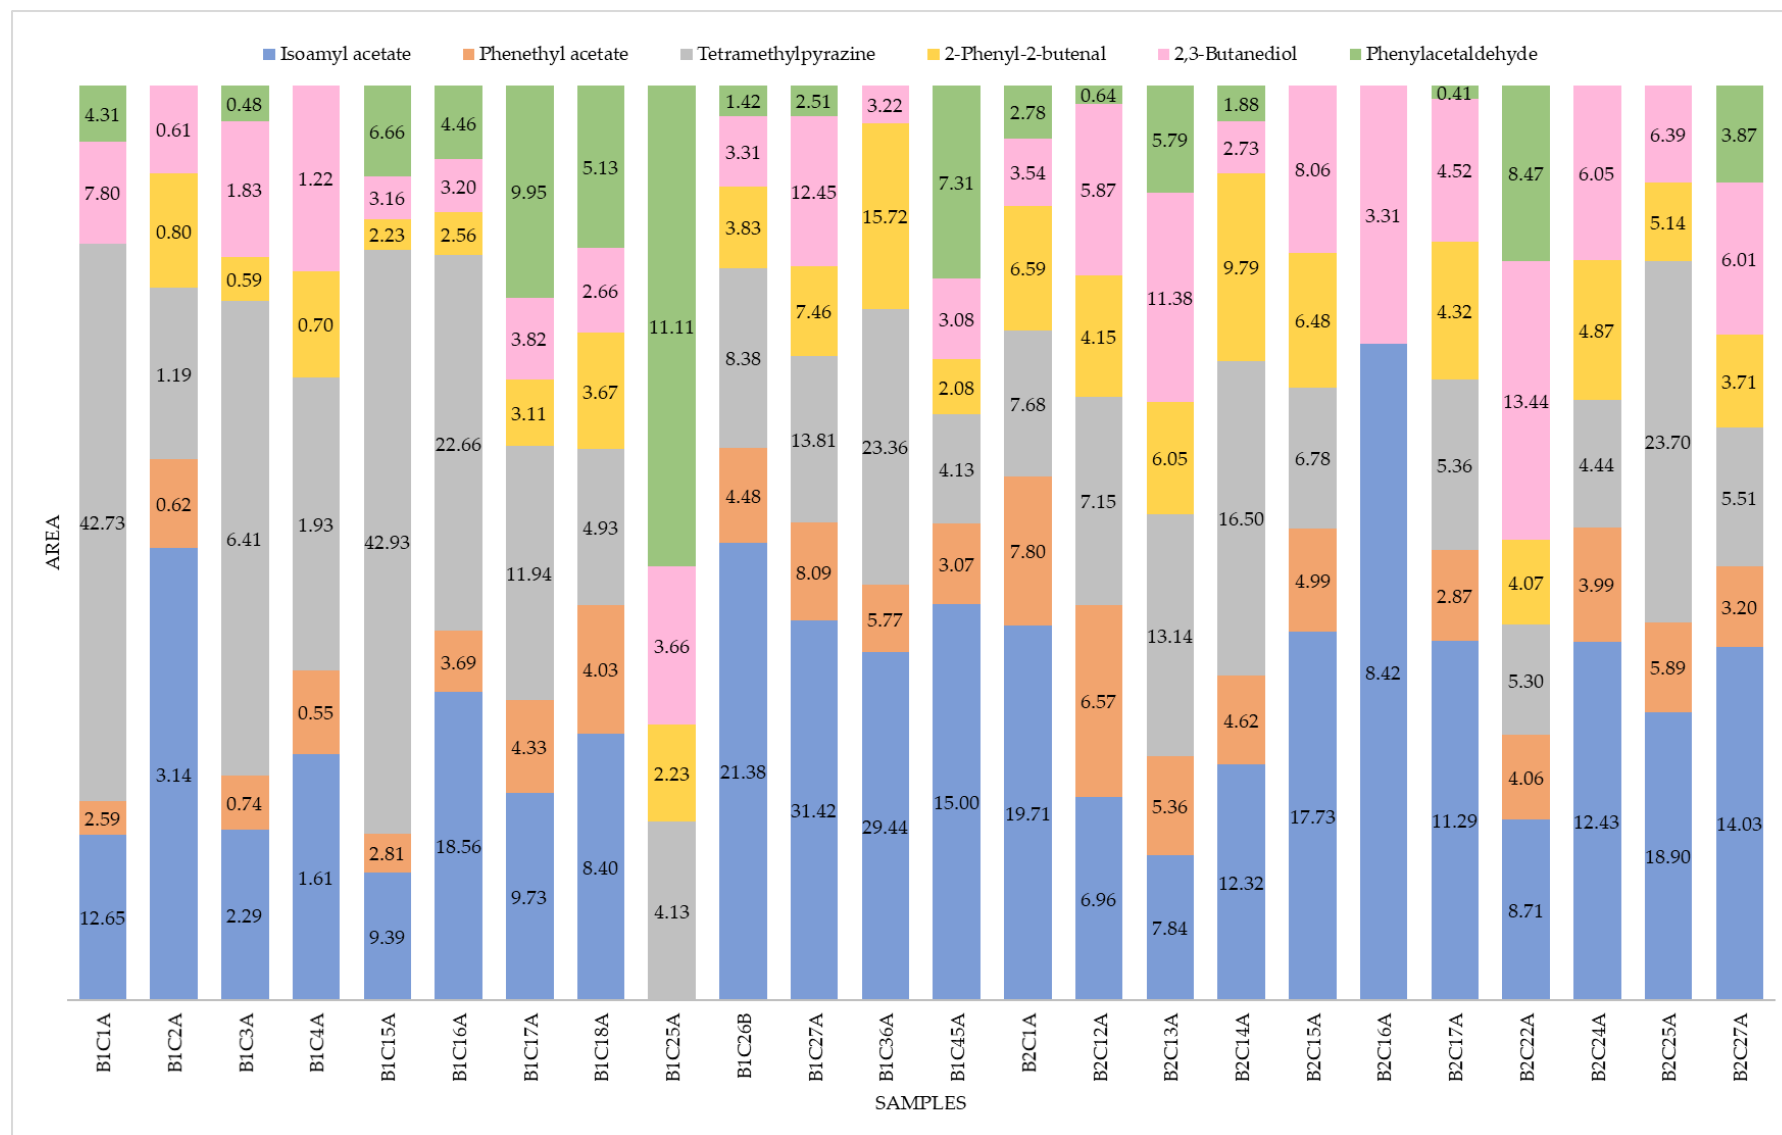

**Figure S3.** Peak areas of the six volatile compounds found in the fermented cocoa bean samples used to develop the machine learning model. All values are reported in scientific notation 10<sup>3</sup>. Sample codes: B1 = Block 1, B2 = Block 2 0.25 cm, C# = number of the tree, and A or B = position of the tree (row).
